1 **Plant seeds are primed by herbivore-induced plant volatiles**

2

3

4 **Short Title:** Seed priming by HIPVs

5

6

7 Abhinav K. Maurya, Leila Pazouki, and Christopher J. Frost

8 139 Life Sciences Building, Department of Biology, University of Louisville, Louisville,

9 Kentucky, 40292, USA

10

11 A.K.M. ORCID ID: 0000-0003-4251-394X

12 L. P. ORCID ID: 0000-0002-8017-5753

13

14 Author for correspondence:

15 Christopher J. Frost

16 139 Life Sciences Building

17 University of Louisville

18 Louisville, KY 40292, USA

19 [chris.frost@louisville.edu](mailto:chris.frost@louisville.edu)

20 ORCID ID: 0000-0001-5986-8646

21

22 **Abstract**

23

24 Mature plants can detect and respond to herbivore-induced plant volatiles (HIPVs) by priming or  
25 directly activating defenses against future herbivores. Whether other plant life stages can respond  
26 to HIPVs in similar manners is poorly understood. For example, seeds are known to respond to a  
27 variety of environment cues that are essential for proper germination timing and survival. Seeds  
28 may also be exposed to HIPVs prior to germination, and such exposure may affect the growth,  
29 development, and defense profiles when the seeds grow into mature plants. Here, we investigated  
30 the effect of seed exposure to common HIPVs on growth, reproduction and defense  
31 characteristics in the model plants *Arabidopsis thaliana* and *Medicago truncatula*. Of all the  
32 HIPVs tested, indole specifically reduced both beet armyworm growth on *A. thaliana* and pea  
33 aphid fecundity on *M. truncatula*. Induction of defense genes was not affected by seed exposure  
34 to indole in either plant species, suggesting that seed priming operates independently of induced  
35 resistance. Moreover, neither species showed any negative effect of seed exposure to HIPVs on  
36 vegetative and reproductive growth. Rather, *M. truncatula* plants derived from seeds exposed to  
37 *z*-3-hexanol and *z*-3-hexenyl acetate grew faster and produced larger leaves compared to  
38 controls. Our results indicate that seeds are sensitive to specific HIPVs, which represents a novel  
39 ecological mechanism of plant-to-plant communication.

40

41 Keywords: Seed Priming, Herbivore-Induced Plant Volatiles, Indole, *z*-3-hexanol and *z*-3-  
42 hexenyl acetate, Beet Armyworm, Pea Aphid

43

44

## 45 **Introduction**

46           Spermatophytes (or seed plants) are a dominant clade of vascular plants on earth (Friis *et*  
47 *al.*, 2011; Simonin & Roddy, 2018). Their dominance is due to large part to the evolution of the  
48 seed, which provides protection to the embryo prior to germination and nutrition during the  
49 transition to autotrophy. One advantage of the seed is the ability to survive long periods of time  
50 in dormancy until environmental conditions are suitable for germination and growth. During  
51 dormancy, seeds are inevitably exposed to a variety of biotic and abiotic environmental  
52 conditions such as temperature, moisture, fire, soil chemicals, and chemical exudates of plant  
53 and microbial origin that may affect their germination (Fenner, 2000). Many of these conditions  
54 are well-established cues that seeds use to coordinate their physiology and metabolism to  
55 properly time germination to maximize viability and establishment (Karszen & Hilhorst, 2000;  
56 Bentsink & Koornneef, 2008). Temperature (Probert, 2000; Reynolds *et al.*, 2001), rainfall  
57 (Gutterman, 1994; Pake & Venable, 1996; Levine *et al.*, 2008), and light (Wesson & Wareing,  
58 1969; Milberg *et al.*, 2000; Flores *et al.*, 2006) are well-documented abiotic environmental cues  
59 that affect the germination of seeds, and responses to these cues are regulated through  
60 phytohormone signaling pathways (Chen *et al.*, 2008; Seo *et al.*, 2008; Toh *et al.*, 2008).

61           In addition to abiotic cues, seeds can perceive a variety of chemical cues of biological  
62 origins that can affect germination and subsequent defensive profiles. For example, low  
63 molecular weight phenolic compounds in soil (Muscolo *et al.*, 2001), artemisinin released from  
64 leaves (Chen & Leather, 1990) and catechin released from plants after herbivory (Thelen *et al.*,  
65 2005) inhibit seed germination. In contrast, smoke-derived karrikins (Flematti *et al.*, 2004; Dixon  
66 *et al.*, 2009; Nelson *et al.*, 2012) and strigolactone (SL) phytohormones released from plant roots  
67 can stimulate seed germination (Cook *et al.*, 1966; Bergmann *et al.*, 1993). Moreover, recent  
68 studies have shown that seeds are receptive to the direct application of exogenous  
69 phytohormones that can activate plant defenses (Rajjou *et al.*, 2006; Worrall *et al.*, 2012;  
70 Jucelaine *et al.*, 2018). For example, treating tomato seed with the phytohormone jasmonic acid  
71 (JA) and  $\beta$ -aminobutyric acid (BABA) lead to JA- and ethylene-dependent resistance in future  
72 plants against spider mite, caterpillars, aphids, and pathogens (Worrall *et al.*, 2012). Seed  
73 treatment with JA also changes the volatile composition of mature plants, making their blends  
74 more attractive to predatory mites (Smart *et al.*, 2013). Similarly, seed treatment with salicylic  
75 acid (SA) enhances the expression of SA-related genes and the endogenous SA level against root

76 holoparasite (*Orobanche cumana*) (Yang *et al.*, 2016). Additionally, seed coating with plant  
77 growth promoting rhizobacteria (PGPR) and plant growth promoting fungus (PGPF) enhances  
78 seed germination, seedling establishment, and boosts induced defenses in future plants in SA-,  
79 ET-, and JA-dependent manners (Ryu *et al.*, 2004; Rudrappa *et al.*, 2010; Sharifi & Ryu, 2016).

80 Seeds also come in contact with biotic agents that are volatile. Inhibitory and allelopathic  
81 effects of some plant and microbial derived volatile organic compounds (VOCs) have been  
82 known for a long time (Muller & Muller, 1964; Muller, 1965; Oleszek, 1987; Bradow &  
83 Connick, 1990; Koitabashi *et al.*, 1997; Mirabella *et al.*, 2008). Whereas these VOCs do not  
84 necessarily provide contextual information about future environmental conditions, herbivore-  
85 induced plant volatiles (HIPVs) represent potentially reliable and adaptive indicators of  
86 herbivory. The function of HIPVs in priming or directly inducing plant defenses is now well  
87 established (Engelberth *et al.*, 2004; Frost *et al.*, 2007; Rodriguez-Saona & Frost, 2010), and  
88 exposure of undamaged plants to HIPVs is known to induce or prime the genes in phytohormone  
89 pathways (Bate & Rothstein, 1998; Engelberth *et al.*, 2007; Frost *et al.*, 2008c). Moreover,  
90 aboveground HIPV priming cues are also produced belowground by plant roots (Lawo *et al.*,  
91 2011; Palma *et al.*, 2012; Gfeller *et al.*, 2013; Barsics *et al.*, 2017) and rhizosphere organisms  
92 (Bhattacharyya *et al.*, 2015; Kanchiswamy *et al.*, 2015). Therefore, there are multiple routes by  
93 which seeds could be exposed to HIPVs, including simple diffusion of HIPVs produced  
94 belowground (Peñuelas *et al.*, 2014) and precipitation and leaching of HIPVs produced  
95 aboveground (Muller *et al.*, 1964; H B Tukey, 1970). While some HIPVs may have allelopathic  
96 effects on seed germination (Preston *et al.*, 2002; Karban, 2007; Mirabella *et al.*, 2008), whether  
97 exposure of seeds to HIPVs alters subsequent plant physiology and defense is currently  
98 unknown.

99 Here, we determined the effect of seed exposure to HIPVs on plant growth and direct  
100 defenses. Specifically, we used a comparative approach to investigate the effects of HIPV  
101 exposure to the seeds of (1) *A. thaliana* on the performance of a chewing herbivore (beet  
102 armyworm; *Spodoptera exigua*) and (2) *M. truncatula* on the performance of a phloem feeding  
103 herbivore (pea aphid; *Acyrtosiphon pisum*). We also tested the effect of seed exposure to plant  
104 volatile on the growth, development, and defense gene expression of *A. thaliana* and *M*  
105 *truncatula*. We specifically tested HIPVs that have been shown previously to prime mature  
106 plants: indole, *cis*-3-hexenol (z3HOL), *cis*-3-hexenyl acetate (z3HAC),  $\beta$ -caryophyllene (BCP),

107 and *trans*-2-hexanol (*e*2HAL). We predicted that HIPV exposure to seeds would prime the  
108 resulting mature plants for enhanced resistance against both chewing and phloem-feeding  
109 herbivores.

110

## 111 **Materials and Methods**

112

### 113 **Plant material:**

114 *A. thaliana* (Col-0) seeds were surface sterilized in 75% (v/v) ethanol for five minutes  
115 and 20% bleach (v/v) in .01% Tween-20 for ten minutes. After sterilization the seeds were  
116 washed three times with distilled water and spread on petri-plates with wet Whatman paper.  
117 Petri plates were kept at 4°C for 2 days, this allowed the seeds to break dormancy and  
118 synchronize germination.

119 *M. truncatula*, A-17 seeds were scarified in concentrated H<sub>2</sub>SO<sub>4</sub> for 10 min and surface  
120 sterilized in 20% (v/v) bleach in 0.1% (v/v) Tween-20 solution for 10 min. Seeds were rinsed  
121 five times with sterile water and were spread on petri plates with wet Whatman paper. Petri  
122 plates were covered with aluminum foil to maintain dark environment and kept at 4°C for two  
123 days.

124

### 125 **Seed treatment with plant volatiles**

126 Volatile dispensers were used to treat *A. thaliana* and *M. truncatula* seeds to individual  
127 plant volatiles. For preparing volatile dispensers 20 µl of *cis*-3-hexenol, *cis*-3-hexenyl acetate  
128 (Engelberth *et al.*, 2004), *trans*-2-hexenal, β-caryophyllene and 20 mg indole (Erb *et al.*, 2015)  
129 was added into separate 2.0 ml amber glass vial (Agilent Technologies) with 1 mg of glass wool  
130 (Fig. S1). Control volatile dispensers had only glass wool without any volatile. The amber vials  
131 with volatiles were sealed with a rubber septum and connected to the 2-ounce plastic cup by  
132 piercing the plastic cup and amber vial rubber septum with an 18-gauge needle. This procedure is  
133 similar to what has been used previously for controlled administration of HIPVs (Erb *et al.*,  
134 2015). Each volatile was administered to seeds in multiple plastic cups (biological replicates) and  
135 number of seeds planted from each plastic cups constituted the technical replicates.

136

### 137 ***A. thaliana* Seed germination**

138 Each volatile was administered to seeds in 5 replicates (plastic cups). After one day of  
139 volatile treatment, two *A. thaliana* seeds were transferred from each plastic cups to agar plates  
140 containing 1.0% (w/v) agar (Sigma) and standard 0.5X MS medium (Murashige and Skoog basal  
141 at an adjusted pH of 7.0). Total 9 agar plates were used for each volatile treatment. The Petri  
142 dishes were kept in growth chamber at 25°C under a 16 h light: 8 h dark (16L: 8D) day/night  
143 cycle for two days. Percent seed germination was measured after two days of seed transfer from  
144 plastic cup to petri-plates.

145

#### 146 ***A. thaliana* growth**

147 After one day of volatile treatment, *A. thaliana* seeds were transferred to 5.5 x 5.5 x 5.5  
148 cm pots filled with sterile Metro-Mix 360 soil. After transplanting, pots were  
149 placed on trays (54 x 28 x 6 cm).in a growth chamber at 25°C under a 12 h light: 12 h dark (12L:  
150 12D) cycle. Once germinated seedlings reached to 4-6 leaf stage, they were fertilized twice a  
151 week with 10 ml 1/2 strength Hoagland's solution. Arabidopsis growth and fitness were  
152 measured in terms of number of leaves, maximum rosette diameter, the length of the bolt and  
153 number of siliques produced.

154

#### 155 ***M. truncatula* growth**

156 Volatile exposed *M. truncatula* seeds were planted in 9 x 6.5 x 6.5 cm pots as described  
157 above. The trays were kept in growth chamber at 25°C under a 12 h light: 12 h dark (12L: 12D)  
158 day/night cycle for ten days. After 10 days the trays were moved to green house and kept there  
159 till the end of the experiment. *M. truncatula* growth and fitness were measured in terms of  
160 petiole length, leaf blade length, leaf blade width, main shoot length, axillary shoot length and  
161 number of fruits using numerical nomenclature coding system developed by Bucciarelli *et al.*  
162 (2006). The numerical nomenclature for vegetative growth (Fig. S3) starts with first unifoliate  
163 leaf as metamer 1 (m1) followed by first trifoliate as metamer 2 (m2) and so on. The axillary  
164 shoots are coded as per the their metamer of origin (e.g. the axillary shoot originating from first  
165 unifoliate or metamer 1 is also designated as m1). Additionally, decimal addition to numerical  
166 coding system defines the development stage of leaf (e.g. m2.1 represent the bud break for the  
167 first trifoliate, m2.5 represent the half open blade of first trifoliate while m2.9 represent fully  
168 developed first trifoliate).

169

## 170 **Caterpillar herbivory**

171 Beet armyworm (*Spodoptera exigua*) was used to evaluate the effect of seed exposure to  
172 HIPVs on herbivore defense of Arabidopsis plants. Caterpillar eggs were ordered from Benzon  
173 Research Inc. USA (Permit #P526P-16-02563). Egg masses were immediately transferred to  
174 artificial diet in 2-ounce plastic cups. Eggs in plastic cups were maintained at 24°C on artificial  
175 diet until the desired instar. Third instar caterpillars were used for feeding experiment on five to  
176 six-week-old, vegetative stage, *A. thaliana* plants. For the first feeding experiment, each volatile  
177 was administered to seeds in six plastic cups (biological replicates) and three seeds were planted  
178 from each plastic cups (three technical replicates). For the second feeding experiment, each  
179 volatile treatment had 10 biological replicates) and three technical replicates. For feeding  
180 experiment caterpillars were starved for 3 hours and weighed before their transfer to Arabidopsis  
181 plants. One third-instar caterpillar was placed on each Arabidopsis plants. The plants were  
182 covered with a nylon mesh bag to avoid the caterpillar escape. The caterpillars were allowed to  
183 feed freely for 24 h before being removed from the plants. After their removal, the caterpillars  
184 were kept at room temperature for three hours to allow the digestion of ingested plant material.  
185 Caterpillars that molted during the second experiments were removed from the assay analysis.  
186 After 3 h the caterpillars were weighted on microbalance. Aboveground plant material was also  
187 collected in liquid nitrogen and stored at -80 °C for later molecular work.

188

## 189 **Aphid herbivory**

190 Pea aphid (*Acyrtosiphon pisum*) colony was maintained on fava bean plant kept in  
191 growth chamber (20 °C, 12:12 h light:dark). For aphid feeding experiment, three adult aphids  
192 (defined as F<sub>0</sub> generation) (Tomczak & Müller, 2017) were placed in an insect bag (L15 X W6,  
193 BugDorm) on three trifoliolate (8 to 10 plants per treatment). After 24 h, the adults were removed  
194 and one trifoliolate was collected while 5 nymphs (defined as F<sub>1</sub> generation) were left on the plant  
195 for 13 more days. For 13 days the nymphs grew and produced offspring (F<sub>2</sub> generation). On 14<sup>th</sup>  
196 day the all the aphids were collected, the total offspring (F<sub>2</sub>) were counted and weighed on  
197 microbalance. Aboveground plant material was also collected on day 14 in liquid nitrogen and  
198 stored at -80 °C for later molecular work.

199



## 200 **Gene expression analysis**

201 Aboveground tissue collected from *A. thaliana* plants after one day of caterpillar  
202 herbivory and *M. truncatula* after 14 days of aphid feeding were used for gene expression  
203 analysis. Total RNA was isolated from approx. 150 mg of ground tissue using modified cetyl  
204 trimethylammonium bromide (CTAB) method (Frost *et al.*, 2012). RNA was quantified with  
205 Nanodrop and integrity was confirmed using a native 1% agarose-0.5x TAE gel. Total RNA (2.5  
206 µg per sample) was treated with DNase (Turbo DNase, Ambion), then 0.7 µg of DNA-free  
207 RNA was reverse-transcribed to cDNA using High Capacity cDNA Reverse Transcript Kit  
208 (Applied Biosystems). Real-time PCR was done using the Quant Studio-3 PCR System (Applied  
209 Biosystems) with each reaction containing 2 µl of EvaGreen® PCR Master Mix (Mango  
210 Biotechnology), 0.3 µl of 10 µM forward and reverse primer, 5.4 µl of DI water, and 2µl (2.5 ng)  
211 of cDNA in a total volume of 10 µl. Primer specificity was confirmed by melting curve analysis,  
212 and relative transcript levels were calculated using the  $2^{-\Delta CT}$  method (Livak & Schmittgen, 2001)  
213 with elongation factor 1-alpha (*EF1-α*) and Glyceraldehyde 3-phosphate dehydrogenase  
214 (*GAPDH*) as reference genes for *M. truncatula* and Actin-7 and *GAPDH* as reference genes for  
215 *A. thaliana*. Primer sequences for all *M. truncatula* and *A. thaliana* genes tested are listed in  
216 Table 1.

217

## 218 **Statistical analyses**

219 Raw data were checked for normality and homogeneity of variance before performing the  
220 parametric tests. For *A. thaliana*, leaf number, rosette diameter, were analyzed using repeated  
221 measures ANOVA. For *M. truncatula*, leaf petiole length, leaf blade length and width, main  
222 shoot and axillary shoot length were analyzed using one-way ANOVA followed by Dunnett  
223 post-hoc test. Other response variables for *A. thaliana* and *M. truncatula* growth along with  
224 caterpillar growth rate, aphid number and aphid weight were analyzed for significance using  
225 student's t-test. For t-test, treatments were compared to controls. The gene expression data were  
226 analyzed using one way ANOVA followed by Tukey's post-hoc test. Statistical analyses were  
227 performed using R version 3.4.2 and GraphPad Prism and figures were generated via GraphPad  
228 Prism.

229

230



## 231 **Results**

232

### 233 **Seed exposure to indole enhances plant resistance against chewing and sap feeding** 234 **herbivores**

235 Indole exposure to seeds reduced the relative growth rate of *S. exigua* caterpillars feeding  
236 on mature foliage by 33% ( $p=0.0706$ , Fig. 1a) and 30% respectively ( $p=0.0124$ , Fig. 1b) in  
237 separate experiments. In contrast, seed exposure to GLVs and terpenes had no effect on  
238 caterpillar growth ( $p>0.05$ , Fig. 1a). We observed similar effects of indole in *M. truncatula*, where  
239 pea aphids fecundity and total weight were reduced by 28% ( $p=0.007$ , Fig. 1c) and 41%  
240 ( $p=0.015$ , Fig. 1d), respectively. Additionally, z3HAC seed treatment to *M. truncatula* reduced pea  
241 aphid fecundity by 27% ( $p=0.0354$  Fig. 1c) and total nymph weight by 35% ( $p=0.067$  Fig. 1d).

242

### 243 **Seed exposure to indole does not affect growth and development of *A. thaliana***

244 *A. thaliana* seed exposure to HIPVs had no significant differences relative to controls on  
245 the vegetative and reproductive growth. We found no differences in leaf number ( $p_{\text{trt}}=0.997$ , Fig.  
246 2a), rosette diameter ( $p_{\text{trt}}=0.672$ , Fig. 2b), bolt length ( $p=0.333$ , Fig. 2c), silique number  
247 ( $p=0.460$ , Fig. 2d), and fresh shoot weight ( $p=0.107$ , Fig. 2e) of plant that were grown from  
248 seeds exposed to any HIPV relative to control plants.

249 We also measured the effect of HIPV exposure on seed germination of *A. thaliana* on MS  
250 media. Of all the HIPVs tested, only seed exposure to the GLV e2HAL reduced seed  
251 germination by 26% compared to control seeds ( $p<0.001$ , Fig. 2f).

252

### 253 **Seed exposure to GLVs enhances *M. truncatula* growth**

254 *M. truncatula* seed exposure to z3HOL and z3HAC increased plant vegetative growth  
255 (Fig. 3a). Petiole length ( $p<0.05$ , Fig. 3b), leaf blade length ( $p<0.05$ , Fig. 3c), leaf blade width  
256 (Fig. 3d) and axillary shoot length ( $p<0.05$ , Fig. 3e) of the z3HOL and z3HAC exposed seed  
257 plants were higher compared to control plants while no such effect was seen on main shoot  
258 length ( $p_{\text{global}}=0.016$ ,  $p_{\text{Dunnett's}}>0.05$ , Fig. S2a). No other HIPV affected vegetative growth in *M.*  
259 *truncatula*. Furthermore, while z3HOL and z3HAC affected the vegetative growth, there was no  
260 difference in reproductive output of plants grown from HIPV-exposed seeds than control seeds  
261 ( $p=0.929$ , Fig. S2b).

262

263 **Seed exposure to indole does not affect herbivore-inducible defense gene expression after**  
264 **caterpillar or aphid herbivory**

265 Since there was a clear effect of indole seed treatment on caterpillar and aphid fecundity,  
266 we assessed whether this effect was due to indole-mediated changes in inducible defenses. In *A.*  
267 *thaliana* challenged with *S. exigua*, we analyzed the expression of genes related to JA synthesis  
268 (*LOX2*, Fig. 4a) and signaling (*MYC2*, Fig. 4b), and glucosinolate biosynthesis (*CYB79-B2* and  
269 *CYB79-B3*, Fig. 4c-d). Caterpillar herbivory induced the expression of these four marker genes  
270 as expected, but indole-seed treatment neither directly stimulated nor statistically altered the  
271 caterpillar-induced expression patterns of these genes. In *M. truncatula* challenged with aphids,  
272 we analyzed two SA-regulated marker genes, *PR5* and *BGL-1*, which have previously been  
273 shown to be responsive to aphid feeding (Moran & Thompson, 2001; Gao *et al.*, 2008). *PR5* and  
274 *BGL-1* were induced by aphid feeding (Fig. 4e-f), but indole seed treatment neither directly  
275 stimulated nor statistically altered the aphid-induced expression patterns of these genes. That is,  
276 in all cases, indole did not directly induce, indirectly prime, or affect the magnitude of herbivore  
277 induction of these defense genes.

278

279 **Discussion**

280 We show that seeds are viable receivers of HIPVs in ways that prime defenses and, in  
281 some cases, directly stimulate growth. Specifically, our study demonstrates that the pre-  
282 germination exposure of seeds to indole enhances resistance against herbivores of two feeding  
283 guilds in two different plant species without any apparent effects on plant growth or fitness. Our  
284 study also showed that seed exposure to z3HOL and z3HAC can enhance plant growth in *M.*  
285 *truncatula*. Biotic cues that reliably indicate future biotic stress can prime plant defenses for  
286 faster and/or stronger defenses following subsequent stress events (Conrath *et al.*, 2006; Frost *et*  
287 *al.*, 2008a). The phenomenon of HIPV-mediated priming is now well established in mature  
288 plants (Engelberth *et al.*, 2004; Frost *et al.*, 2007; Frost *et al.*, 2008b; Frost *et al.*, 2008c;  
289 Rodriguez-Saona *et al.*, 2009; Erb *et al.*, 2015). To our knowledge, our study is the first to show  
290 that seeds can also be primed by HIPVs. Moreover, seed exposure to HIPVs had no adverse  
291 effect on seed germination, vegetative growth and reproductive output of the primed mature  
292 plants (Fig. 2 & 3). Such a long-persisting defense response without apparent negative

293 consequence on plant growth and development may be indicative of defense priming rather than  
294 direct activation of induced defenses.

295         HIPV-mediated defense priming is theoretically a component of an inducible resistance  
296 phenotype (Frost *et al.*, 2008a; Hilker *et al.*, 2016). Since seed treatment with defense  
297 phytohormones (e.g., JA, SA and BABA) primes defenses by modulating stress-related signaling  
298 pathways (Azooz, 2009; Worrall *et al.*, 2012; Jucelaine *et al.*, 2018), we hypothesized that  
299 volatile indole would prime seeds through inducible signaling pathways. We therefore predicted  
300 that seed-primed plants would show primed inducible defenses compared to controls when  
301 challenged with herbivores. For example, Worrall *et al.* (2012) showed that seed treatment with  
302 JA and BABA primed the antiherbivore and antipathogen defenses in mature *Arabidopsis* plants  
303 by JA-dependent processes. However, in our case, JA-related octadecanoid pathway  
304 (Wasternack, 2007; Ballaré, 2011) and glucosinolate biosynthesis (Hopkins *et al.*, 1998;  
305 Reymond *et al.*, 2004) marker genes were induced by *S. exigua* feeding to similar levels  
306 independent of indole seed treatment (Fig. 4). Similarly, marker genes for SA-related defense  
307 (Walling, 2008) in *M. truncatula* were induced by *A. pisum* but were not additionally enhanced  
308 by seed treatment (Fig. 4). Therefore, HIPV-mediated seed priming operates through a  
309 mechanism independent of inducible resistance. Moreover, indole seed treatment did not directly  
310 induce any marker gene before herbivory, further ruling out direct activation of induced  
311 resistance via seed priming (Fig. 4). Since we measured just single time points as indicators of  
312 inducible defense, it is possible that seed priming altered the temporal dynamics of induced  
313 defense. However, the time points we chose are reflective of sustained defense activation, which  
314 is one important aspect of defense priming. The enhanced defense in indole-exposed seed plants  
315 in our study is therefore likely a result of change in plant nutritive and defense chemistry.

316         Indole was the only HIPV we tested that primed plant defenses after seed exposure, and  
317 this effect was consistent across two model plants against herbivores of different feeding guilds.  
318 Indole is an ubiquitous, inter-kingdom intermediate in critical biochemical pathways (Zhang *et al.*  
319 *et al.*, 2008) and a signaling molecule (Lee *et al.*, 2015). In plants, indole is also a common HIPV  
320 that contributes to direct and indirect defenses (Veyrat *et al.*, 2016; Gasmi *et al.*, 2018) and also  
321 acts as a defense priming cue (Erb *et al.*, 2015; Ye *et al.*, 2018). Our study adds an additional  
322 facet to the ecological role of indole in plant communication. That said, rhizosphere inhabiting  
323 bacteria also produce volatile indole, which can modulate plant growth via auxin pathway (Blom

324 *et al.*, 2011; Yu & Lee, 2013; Bailly *et al.*, 2014; Bhattacharyya *et al.*, 2015). We tested the  
325 genes *CYP79B2* and *CYP79B3* in *A. thaliana* which involve in enzyme production that convert  
326 tryptophan (Trp) to indole-3-acetaldoxime (IAOx), a rate determining intermediate in auxin  
327 biosynthesis pathway and plant defense compound indole glucosinolates biosynthesis (Zhao *et*  
328 *al.*, 2002). Seed exposure to indole alone did not upregulate either gene, but *S. exigua* feeding  
329 induced their expression independent of seed exposure to indole (Fig. 4. c & d). Therefore, the  
330 auxin pathway may not be involved in indole-mediated seed priming. Nevertheless, seed priming  
331 was consistent in two different plant species against different feeding guilds of herbivores,  
332 suggesting a clear role for indole in mediating plant-seed communication.

333 Exposure of *M. truncatula* seeds to two GLVs (z3HOL and z3HAC) stimulated  
334 vegetative growth. Our group has recently seen similar vegetative and reproductive growth  
335 stimulation using a low-dose, persistent application of z3HAC in lima bean plants (Freundlich &  
336 Frost, 2018). In lima bean and *M. truncatula*, plants with increased growth also were better  
337 defended (Freundlich & Frost, 2018) and Figs 1&3). GLVs are well-established priming cues  
338 against biotic stress (Engelberth *et al.*, 2004; Frost *et al.*, 2008c), and volatile communication  
339 between plants can alter biomass allocation (Ninkovic, 2003). Our results suggest that GLVs can  
340 also stimulate plant growth and ostensibly overcome the growth-defense dilemma (Herms &  
341 Mattson, 1992) in some plant species. One caveat, though, is that our group also has shown that  
342 persistent exposure to z3HAC reduces growth in *Capsicum annuum* (Freundlich & Frost, 2018),  
343 therefore the stimulating effect of GLVs is not universal.

344 As a final point, our results have potential applications in pest control and seed  
345 management. Recent attention has focused on leveraging priming of innate plant immunity  
346 (Pichersky & Gershenzon, 2002; Dervinis *et al.*, 2010; Song & Ryu, 2013; Song *et al.*, 2015;  
347 Pickett & Khan, 2016), due in part to presumed lower fitness costs of priming based defenses  
348 (van Hulten *et al.*, 2006; Buswell *et al.*, 2018). In-field foliar or soil application of these agents  
349 can induce plant defenses against herbivores (Bruce *et al.*, 2003; War *et al.*, 2011; Song & Ryu,  
350 2013), but can also be prohibitively costly for large-scale application. In contrast, seed treatments  
351 are a common method of inoculating crops (Paparella *et al.*, 2015), and direct application of  
352 HIPVs to seeds could provide more viable priming-mediated solution to pest management.  
353 Moreover, *M. thaliana* is a close relative of fodder crop alfalfa, and improved vegetative growth  
354 after seed treatment with GLVs may provide a mechanism for enhancing fodder capacity and

355 rejuvenating soils during crop rotations. Furthermore, HIPV-mediated seed priming may be a  
356 valuable tool in conservation efforts for rare or endangered species (Laetz *et al.*, 2009), if HIPV-  
357 mediated seed priming can enhance their innate immunity. Ultimately, seed priming via HIPVs  
358 represents a novel mechanism in plant-plant communication that may have trans-generational  
359 effects on ecological communities.

360

361

## 362 **References**

- 363 **Azooz M. 2009.** Salt stress mitigation by seed priming with salicylic acid in two faba bean genotypes  
364 differing in salt tolerance. *International Journal of Agriculture & Biology* **11**(4): 343-350.
- 365 **Bailly A, Groenhagen U, Schulz S, Geisler M, Eberl L, Weisskopf L. 2014.** The inter-kingdom volatile  
366 signal indole promotes root development by interfering with auxin signalling. *The Plant Journal*  
367 **80**(5): 758-771.
- 368 **Ballaré CL. 2011.** Jasmonate-induced defenses: a tale of intelligence, collaborators and rascals. *Trends in*  
369 *plant science* **16**(5): 249-257.
- 370 **Barsics F, Delory BM, Delaplace P, Francis F, Fauconnier M-L, Haubruge É, Verheggen FJ. 2017.** Foraging  
371 wireworms are attracted to root-produced volatile aldehydes. *Journal of Pest Science* **90**(1): 69-  
372 76.
- 373 **Bate NJ, Rothstein SJ. 1998.** C6-volatiles derived from the lipoxygenase pathway induce a subset of  
374 defense-related genes. *The Plant Journal* **16**(5): 561-569.
- 375 **Bentsink L, Koornneef M. 2008.** Seed dormancy and germination. *The arabidopsis book* **6**: e0119-e0119.
- 376 **Bergmann C, Wegmann K, Frischmuth K, Samson E, Kranz A, Weigelt D, Koll P, Welzel P. 1993.**  
377 Stimulation of *Orobancha crenata* seed germination by (+)-strigol and structural analogues  
378 dependence on constitution and configuration of the germination stimulants. *Journal of Plant*  
379 *Physiology* **142**(3): 338-342.
- 380 **Bhattacharyya D, Garladinne M, Lee YH. 2015.** Volatile indole produced by *Rhizobacterium Proteus*  
381 *vulgaris* JBLS202 stimulates growth of *Arabidopsis thaliana* through auxin, cytokinin, and  
382 brassinosteroid pathways. *Journal of Plant Growth Regulation* **34**(1): 158-168.
- 383 **Blom D, Fabbri C, Connor EC, Schiestl FP, Klausner DR, Boller T, Eberl L, Weisskopf L. 2011.** Production of  
384 plant growth modulating volatiles is widespread among rhizosphere bacteria and strongly  
385 depends on culture conditions. *Environmental Microbiology* **13**(11): 3047-3058.
- 386 **Bradow JM, Connick WJ. 1990.** Volatile seed germination inhibitors from plant residues. *Journal of*  
387 *chemical ecology* **16**(3): 645-666.
- 388 **Bruce TJA, Martin JL, Pickett JA, Pye BJ, Smart LE, Wadhams LJ. 2003.** Cis-Jasmone treatment induces  
389 resistance in wheat plants against the grain aphid, *Sitobion avenae* (Fabricius) (Homoptera:  
390 Aphididae). *Pest management science* **59**(9): 1031-1036.
- 391 **Bucciarelli B, Hanan J, Palmquist D, Vance CP. 2006.** A standardized method for analysis of *Medicago*  
392 *Truncatula* phenotypic development. *Plant physiology* **142**(1): 207-219.
- 393 **Buswell W, Schwarzenbacher RE, Luna E, Sellwood M, Chen B, Flors V, Pétriacoq P, Ton J. 2018.**  
394 Chemical priming of immunity without costs to plant growth. *New Phytologist* **218**: 1205-1216.
- 395 **Chen H, Zhang J, Neff MM, Hong S-W, Zhang H, Deng X-W, Xiong L. 2008.** Integration of light and  
396 abscisic acid signaling during seed germination and early seedling development. *Proceedings of*  
397 *the National Academy of Sciences* **105**(11): 4495-4500.



- 398 **Chen PK, Leather GR. 1990.** Plant growth regulatory activities of artemisinin and its related compounds.  
399 *Journal of chemical ecology* **16**(6): 1867-1876.
- 400 **Conrath U, Beckers GJ, Flors V, García-Agustín P, Jakab G, Mauch F, Newman M-A, Pieterse CM,**  
401 **Poinssot B, Pozo MJ. 2006.** Priming: getting ready for battle. *Molecular Plant-Microbe*  
402 *Interactions* **19**(10): 1062-1071.
- 403 **Cook C, Whichard LP, Turner B, Wall ME, Egley GH. 1966.** Germination of witchweed (*Striga lutea*  
404 Lour.): isolation and properties of a potent stimulant. *Science* **154**(3753): 1189-1190.
- 405 **Dervinis C, Frost CJ, Lawrence SD, Novak NG, Davis JM. 2010.** Cytokinin primes plant responses to  
406 wounding and reduces insect performance. *Journal of Plant Growth Regulation* **29**(3): 289-296.
- 407 **Dixon KW, Merritt DJ, Flematti GR, Ghisalberti EL. 2009.** Karriginolide - a phytoactive compound  
408 derived from smoke with applications in horticulture, ecological restoration and agriculture. *Vi*  
409 *International Symposium on New Floricultural Crops* **813**: 155-170.
- 410 **Engelberth J, Alborn HT, Schmelz EA, Tumlinson JH. 2004.** Airborne signals prime plants against insect  
411 herbivore attack. *Proceedings of the National Academy of Sciences USA* **101**(6): 1781-1785.
- 412 **Engelberth J, Seidl-Adams I, Schultz JC, Tumlinson JH. 2007.** Insect elicitors and exposure to green leafy  
413 volatiles differentially upregulate major octadecanoids and transcripts of *12-Oxo Phytodienoic*  
414 *Acid Reductases* in *Zea mays*. *Molecular Plant-Microbe Interactions* **20**(6): 707-716.
- 415 **Erb M, Veyrat N, Robert CA, Xu H, Frey M, Ton J, Turlings TC. 2015.** Indole is an essential herbivore-  
416 induced volatile priming signal in maize. *Nature communications* **6**(6273): 6273.
- 417 **Fenner M. 2000.** *Seeds: the ecology of regeneration in plant communities*: Cabi.
- 418 **Flematti GR, Ghisalberti EL, Dixon KW, Trengove RD. 2004.** A compound from smoke that promotes  
419 seed germination. *Science* **305**(5686): 977-977.
- 420 **Flores J, Jurado E, Arredondo A. 2006.** Effect of light on germination of seeds of Cactaceae from the  
421 Chihuahuan Desert, Mexico. *Seed science research* **16**(2): 149-155.
- 422 **Freundlich GE, Frost C. 2018.** Variable costs of eavesdropping a green leaf volatile on two plant species  
423 in a common garden experiment. *bioRxiv*.
- 424 **Friis EM, Crane PR, Pedersen KR. 2011.** *Early flowers and angiosperm evolution*: Cambridge University  
425 Press.
- 426 **Frost CJ, Appel HM, Carlson JE, De Moraes CM, Mescher MC, Schultz JC. 2007.** Within-plant signalling  
427 via volatiles overcomes vascular constraints on systemic signalling and primes responses against  
428 herbivores. *Ecology Letters* **10**(6): 490-498.
- 429 **Frost CJ, Mescher MC, Carlson JE, De Moraes CM. 2008a.** Plant defense priming against herbivores:  
430 getting ready for a different battle. *Plant physiology* **146**(3): 818-824.
- 431 **Frost CJ, Mescher MC, Carlson JE, De Moraes CM. 2008b.** Why do distance limitations exist on plant-  
432 plant signaling via airborne volatiles? *Plant Signaling & Behavior* **3**(7): 466-468.
- 433 **Frost CJ, Mescher MC, Dervinis C, Davis JM, Carlson JE, De Moraes CM. 2008c.** Priming defense genes  
434 and metabolites in hybrid poplar by the green leaf volatile cis-3-hexenyl acetate. *New*  
435 *Phytologist* **180**(3): 722-734.
- 436 **Frost CJ, Nyamdari B, Tsai C-J, Harding SA. 2012.** The tonoplast-localized sucrose transporter in *Populus*  
437 (*PtaSUT4*) regulates whole-plant water relations, responses to water stress, and photosynthesis.  
438 *PLoS one* **7**(8): e44467.
- 439 **Gao L-L, Klingler JP, Anderson JP, Edwards OR, Singh KB. 2008.** Characterization of pea aphid resistance  
440 in *Medicago truncatula*. *Plant physiology* **146**: 996-1009.
- 441 **Gao LL, Anderson JP, Klingler JP, Nair RM, Edwards OR, Singh KB. 2007.** Involvement of the  
442 octadecanoid pathway in bluegreen aphid resistance in *Medicago truncatula*. *Molecular Plant-*  
443 *Microbe Interactions* **20**(1): 82-93.

- 444 **Gasmi L, Martinez-Solis M, Frattini A, Ye M, Collado MC, Turlings T, Erb M, Herrero S. 2018.** Can  
445 herbivore-induced volatiles protect plants by increasing the herbivores' susceptibility to natural  
446 pathogens? *bioRxiv*.
- 447 **GenScript C. 2006.** Real-time PCR primer design. *GenScript Corporation*.
- 448 **Gfeller A, Laloux M, Barsics F, Kati DE, Haubruge E, du Jardin P, Verheggen FJ, Lognay G, Wathelet J-P,  
449 Fauconnier M-L. 2013.** Characterization of volatile organic compounds emitted by barley  
450 (*Hordeum vulgare* L.) roots and their attractiveness to wireworms. *Journal of chemical ecology*  
451 **39**(8): 1129-1139.
- 452 **Gutterman Y. 1994.** Strategies of seed dispersal and germination in plants inhabiting deserts. *The*  
453 *botanical review* **60**(4): 373-425.
- 454 **H B Tukey J. 1970.** The leaching of substances from plants. *Annual Review of Plant Physiology* **21**(1):  
455 305-324.
- 456 **Herms DA, Mattson WJ. 1992.** The dilemma of plants: to grow or defend. *The Quarterly Review of*  
457 *Biology* **67**(3): 283-335.
- 458 **Hilker M, Schwachtje J, Baier M, Balazadeh S, Bäurle I, Geiselhardt S. 2016.** Priming and memory of  
459 stress responses in organisms lacking a nervous system. *Biological Reviews Cambridge*  
460 *Philosophical Society* **91**: 1118-1133.
- 461 **Hopkins R, Griffiths D, Birch A, McKinlay R. 1998.** Influence of increasing herbivore pressure on  
462 modification of glucosinolate content of swedes (*Brassica napus* spp. rapifera). *Journal of*  
463 *chemical ecology* **24**(12): 2003-2019.
- 464 **Jucelaine H, Ricardi LE, Shimomura HK, Miguel MS, Edgar SV, M. PG. 2018.** Getting ready for battle: do  
465 cabbage seeds treated with jasmonic acid and chitosan affect chewing and sap-feeding insects?  
466 *Entomologia Experimentalis et Applicata* **166**(5): 412-419.
- 467 **Kanchiswamy CN, Malnoy M, Maffei ME. 2015.** Chemical diversity of microbial volatiles and their  
468 potential for plant growth and productivity. *Frontiers in plant science* **6**: 151.
- 469 **Karban R. 2007.** Experimental clipping of sagebrush inhibits seed germination of neighbours. *Ecology*  
470 *Letters* **10**(9): 791-797.
- 471 **Karszen CM, Hilhorst HWM 2000.** Effect of chemical environment on seed germination. In: Fenner M  
472 ed. *Seeds. The ecology of regeneration in plants communities*: Cabi, 293-309.
- 473 **Koitabashi R, Suzuki T, Kawazu T, Sakai A, Kuroiwa H, Kuroiwa T. 1997.** 1,8-Cineole inhibits root growth  
474 and DNA synthesis in the root apical meristem of *Brassica campestris* L. *Journal of Plant*  
475 *Research* **110**(1): 1-6.
- 476 **Kuśnierczyk A, Winge P, Midelfart H, Armbruster WS, Rossiter JT, Bones AM. 2007.** Transcriptional  
477 responses of *Arabidopsis thaliana* ecotypes with different glucosinolate profiles after attack by  
478 polyphagous *Myzus persicae* and oligophagous *Brevicoryne brassicae*. *Journal of Experimental*  
479 *Botany* **58**(10): 2537-2552.
- 480 **Laetz CA, Baldwin DH, Collier TK, Hebert V, Stark JD, Scholz NL. 2009.** The Synergistic Toxicity of  
481 Pesticide Mixtures: Implications for Risk Assessment and the Conservation of Endangered Pacific  
482 Salmon. *Environmental Health Perspectives* **117**(3): 348-353.
- 483 **Lawo NC, Weingart GJF, Schuhmacher R, Forneck A. 2011.** The volatile metabolome of grapevine roots:  
484 First insights into the metabolic response upon phylloxera attack. *Plant Physiology and*  
485 *Biochemistry* **49**(9): 1059-1063.
- 486 **Lee J-H, Wood TK, Lee J. 2015.** Roles of indole as an interspecies and interkingdom signaling molecule.  
487 *Trends in Microbiology* **23**(11): 707-718.
- 488 **Levine JM, McEachern AK, Cowan C. 2008.** Rainfall effects on rare annual plants. *Journal of Ecology*  
489 **96**(4): 795-806.



- 490 **Liu J, Maldonado-Mendoza I, Lopez-Meyer M, Cheung F, Town CD, Harrison MJ. 2007.** Arbuscular  
491 mycorrhizal symbiosis is accompanied by local and systemic alterations in gene expression and  
492 an increase in disease resistance in the shoots. *The Plant Journal* **50**: 529-544.
- 493 **Livak KJ, Schmittgen TD. 2001.** Analysis of relative gene expression data using real-time quantitative  
494 PCR and the  $2^{-\Delta\Delta CT}$  Method. *Methods* **25**: 402-408.
- 495 **Martínez-Medina A, Van Wees S, Pieterse CM. 2017.** Airborne signals by Trichoderma fungi stimulate  
496 iron uptake responses in roots resulting in priming of jasmonic acid-dependent defences in  
497 shoots of *Arabidopsis thaliana* and *Solanum lycopersicum*. *Plant, cell & environment* **40**: 2691–  
498 2705.
- 499 **Milberg P, Andersson L, Thompson K. 2000.** Large-seeded spices are less dependent on light for  
500 germination than small-seeded ones. *Seed science research* **10**(1): 99-104.
- 501 **Mirabella R, Rauwerda H, Struys EA, Jakobs C, Triantaphylidès C, Haring MA, Schuurink RC. 2008.** The  
502 *Arabidopsis* her1 mutant implicates GABA in E-2-hexenal responsiveness. *The Plant Journal*  
503 **53**(2): 197-213.
- 504 **Moran PJ, Thompson GA. 2001.** Molecular responses to aphid feeding in *Arabidopsis* in relation to plant  
505 defense pathways. *Plant physiology* **125**(2): 1074-1085.
- 506 **Muller CH, Muller WH, Haines BL. 1964.** Volatile growth inhibitors produced by aromatic shrubs.  
507 *Science* **143**(3605): 471-473.
- 508 **Muller WH. 1965.** Volatile materials produced by *Salvia leucophylla*: effects on seedling growth and soil  
509 bacteria. *Botanical Gazette* **126**(3): 195-200.
- 510 **Muller WH, Muller CH. 1964.** Volatile growth inhibitors produced by *Salvia* species. *Bulletin of the*  
511 *Torrey Botanical Club*: 327-330.
- 512 **Musco A, Panuccio MR, Sidari M. 2001.** The effect of phenols on respiratory enzymes in seed  
513 germination. *Plant Growth Regulation* **35**(1): 31-35.
- 514 **Nelson DC, Flematti GR, Ghisalberti EL, Dixon KW, Smith SM. 2012.** Regulation of seed germination and  
515 seedling growth by chemical signals from burning vegetation. *Annual review of plant biology*  
516 **63**(1): 107-130.
- 517 **Ninkovic V. 2003.** Volatile communication between barley plants affects biomass allocation. *Journal of*  
518 *Experimental Botany* **54**(389): 1931-1939.
- 519 **Oleszek W. 1987.** Allelopathic effects of volatiles from some Cruciferae species on lettuce, barnyard  
520 grass and wheat growth. *Plant and Soil* **102**(2): 271-273.
- 521 **Pake CE, Venable DL. 1996.** Seed banks in desert annuals: Implications for persistence and coexistence  
522 in variable environments. *Ecology* **77**(5): 1427-1435.
- 523 **Palma R, Mutis A, Manosalva L, Ceballos R, Quiroz A. 2012.** Behavioral and electrophysiological  
524 responses of *Hylastinus obscurus* to volatiles released from the roots of *Trifolium pratense* L.  
525 *Journal of soil science and plant nutrition* **12**(1): 183-193.
- 526 **Paparella S, Araújo SS, Rossi G, Wijayasinghe M, Carbonera D, Balestrazzi A. 2015.** Seed priming: state  
527 of the art and new perspectives. *Plant Cell Reports* **34**(8): 1281-1293.
- 528 **Peñuelas J, Asensio D, Tholl D, Wenke K, Rosenkranz M, Piechulla B, Schnitzler JP. 2014.** Biogenic  
529 volatile emissions from the soil. *Plant, cell & environment* **37**(8): 1866-1891.
- 530 **Pichersky E, Gershenzon J. 2002.** The formation and function of plant volatiles: perfumes for pollinator  
531 attraction and defense. *Current opinion in plant biology* **5**(3): 237-243.
- 532 **Pickett JA, Khan ZR. 2016.** Plant volatile-mediated signalling and its application in agriculture: successes  
533 and challenges. *New Phytologist* **212**(4): 856-870.
- 534 **Preston CA, Betts H, Baldwin IT. 2002.** Methyl jasmonate as an allelopathic agent: sagebrush inhibits  
535 germination of a neighboring tobacco, *Nicotiana Attenuata*. *Journal of chemical ecology* **28**(11):  
536 2343-2369.

- 537 **Probert RJ 2000.** The role of temperature in the regulation of seed dormancy and germination. In:  
538 Fenner M ed. *Seeds: the ecology of regeneration in plant communities*: CABI, 261-292.
- 539 **Rajjou L, Belghazi M, Huguet R, Robin C, Moreau A, Job C, Job D. 2006.** Proteomic investigation of the  
540 effect of salicylic acid on arabidopsis seed germination and establishment of early defense  
541 mechanisms. *Plant physiology* **141**(3): 910-923.
- 542 **Reymond P, Bodenhausen N, Van Poecke RMP, Krishnamurthy V, Dicke M, Farmer EE. 2004.** A  
543 conserved transcript pattern in response to a specialist and a generalist herbivore. *Plant Cell* **16**:  
544 3132-3147.
- 545 **Reynolds SA, Corbin JD, D'Antonio CM. 2001.** The effects of litter and temperature on the germination  
546 of native and exotic grasses in a coastal California grassland. *Madrono* **48**(4): 230-235.
- 547 **Rodriguez-Saona CR, Frost CJ. 2010.** New evidence for a multi-functional role of herbivore-induced plant  
548 volatiles in defense against herbivores. *Plant Signaling & Behavior* **5**(1): 58-60.
- 549 **Rodriguez-Saona CR, Rodriguez-Saona LE, Frost CJ. 2009.** Herbivore-induced volatiles in the perennial  
550 shrub, *Vaccinium corymbosum*, and their role in inter-branch signaling. *Journal of chemical*  
551 *ecology* **35**(2): 163-175.
- 552 **Rudrappa T, Biedrzycki ML, Kunjeti SG, Donofrio NM, Czymmek KJ, Paul W P, Bais HP. 2010.** The  
553 rhizobacterial elicitor acetoin induces systemic resistance in *Arabidopsis thaliana*.  
554 *Communicative & Integrative Biology* **3**(2): 130-138.
- 555 **Ryu C, Farag MA, Hu C, Reddy MS, Kloepper JW, Pare PW. 2004.** Bacterial volatiles induce systemic  
556 resistance in Arabidopsis. *Plant physiology* **134**(3): 1017-1026.
- 557 **Seo M, Nambara E, Choi G, Yamaguchi S. 2008.** Interaction of light and hormone signals in germinating  
558 seeds. *Plant Molecular Biology* **69**(4): 463.
- 559 **Sharifi R, Ryu C-M. 2016.** Are bacterial volatile compounds poisonous odors to a fungal pathogen  
560 *Botrytis cinerea*, alarm signals to Arabidopsis seedlings for eliciting induced resistance, or both?  
561 *Frontiers in microbiology* **7**: 196.
- 562 **Simonin KA, Roddy AB. 2018.** Genome downsizing, physiological novelty, and the global dominance of  
563 flowering plants. *PLoS biology* **16**(1): e2003706.
- 564 **Smart LE, Martin JL, Limpalaër M, Bruce TJA, Pickett JA. 2013.** Responses of herbivore and predatory  
565 mites to tomato plants exposed to jasmonic acid seed treatment. *Journal of chemical ecology*  
566 **39**(10): 1297-1300.
- 567 **Song GC, Choi HK, Ryu C-M. 2015.** Gaseous 3-pentanol primes plant immunity against a bacterial speck  
568 pathogen, *Pseudomonas syringae* pv. tomato via salicylic acid and jasmonic acid-dependent  
569 signaling pathways in Arabidopsis. *Frontiers in plant science* **6**(821).
- 570 **Song GC, Ryu CM. 2013.** Two volatile organic compounds trigger plant self-defense against a bacterial  
571 pathogen and a sucking insect in cucumber under open field conditions. *International Journal of*  
572 *Molecular Sciences* **14**.
- 573 **Thelen GC, Vivanco JM, Newingham B, Good W, Bais HP, Landres P, Caesar A, Callaway RM. 2005.**  
574 Insect herbivory stimulates allelopathic exudation by an invasive plant and the suppression of  
575 natives. *Ecology Letters* **8**(2): 209-217.
- 576 **Toh S, Imamura A, Watanabe A, Nakabayashi K, Okamoto M, Jikumaru Y, Hanada A, Aso Y, Ishiyama**  
577 **K, Tamura N. 2008.** High temperature-induced abscisic acid biosynthesis and its role in the  
578 inhibition of gibberellin action in Arabidopsis seeds. *Plant physiology* **146**(3): 1368-1385.
- 579 **Tomczak VV, Müller C. 2017.** Influence of arbuscular mycorrhizal stage and plant age on the  
580 performance of a generalist aphid. *Journal of Insect Physiology* **98**: 258-266.
- 581 **van Hulst M, Pelser M, van Loon LC, Pieterse CMJ, Ton J. 2006.** Costs and benefits of priming for  
582 defense in Arabidopsis. *Proceedings of the National Academy of Sciences USA* **103**(14): 5602-  
583 5607.

- 584 **Veyrat N, Robert CAM, Turlings TCJ, Erb M. 2016.** Herbivore intoxication as a potential primary function  
585 of an inducible volatile plant signal. *Journal of Ecology* **104**(2): 591-600.
- 586 **Walling LL. 2008.** Avoiding effective defenses: strategies employed by phloem-feeding insects. *Plant*  
587 *physiology* **146**: 859-866.
- 588 **War AR, Paulraj MG, War MY, Ignacimuthu S. 2011.** Herbivore- and elicitor- induced resistance in  
589 groundnut to asian armyworm, *Spodoptera litura* (Fab.) (Lepidoptera: Noctuidae). *Plant*  
590 *Signaling & Behavior* **6**(11): 1769-1777.
- 591 **Wasternack C. 2007.** Jasmonates: An update on biosynthesis, signal transduction and action in plant  
592 stress response, growth and development. *Annals of botany* **100**: 681-697.
- 593 **Wesson G, Wareing PF. 1969.** The role of light in the germination of naturally occurring populations of  
594 buried weed seeds. *Journal of Experimental Botany* **20**(2): 402-413.
- 595 **Worrall D, Holroyd GH, Moore JP, Glowacz M, Croft P, Taylor JE, Paul ND, Roberts MR. 2012.** Treating  
596 seeds with activators of plant defence generates long-lasting priming of resistance to pests and  
597 pathogens. *New Phytologist* **193**(3): 770-778.
- 598 **Yang C, Hu L, Ali B, Islam F, Bai Q, Yun X, Yoneyama K, Zhou W. 2016.** Seed treatment with salicylic acid  
599 invokes defence mechanism of *Helianthus annuus* against *Orobanche cumana*. *Annals of Applied*  
600 *Biology* **169**(3): 408-422.
- 601 **Ye M, Veyrat N, Xu H, Hu L, Turlings TCJ, Erb M. 2018.** An herbivore-induced plant volatile reduces  
602 parasitoid attraction by changing the smell of caterpillars. *Science Advances* **4**(5): eaar4767.
- 603 **Yu SM, Lee YH. 2013.** Plant growth promoting rhizobacterium *Proteus vulgaris* JBLS202 stimulates the  
604 seedling growth of Chinese cabbage through indole emission. *Plant and Soil* **370**(1-2): 485-495.
- 605 **Zhang R, Wang B, Ouyang J, Li J, Wang Y. 2008.** Arabidopsis indole synthase, a homolog of tryptophan  
606 synthase alpha, is an enzyme involved in the trp-independent indole-containing metabolite  
607 biosynthesis. *Journal of Integrative Plant Biology* **50**(9): 1070-1077.
- 608 **Zhao Y, Hull AK, Gupta NR, Goss KA, Alonso J, Ecker JR, Normanly J, Chory J, Celenza JL. 2002.** Trp-  
609 dependent auxin biosynthesis in Arabidopsis: involvement of cytochrome P450s CYP79B2 and  
610 CYP79B3. *Genes & development* **16**(23): 3100-3112.

611

## 612 **Acknowledgements**

613 This work was supported financially by a National Science Foundation grant IOS-  
614 1656625 to C.J.F. We thank Dr. Julia Frugoli for generously providing *M. truncatula*, A-17 seeds  
615 and Dr. Susana Karen Gomez for supplying the pea aphids. We are thankful to Grace Freundlich,  
616 Allie Peot and Rachel Haslem for lab assistance.

617

## 618 **Author Contributions**

619 C.J.F. and A.K.M. designed the research. A.K.M. conducted experiments. A.K.M. and  
620 L.P. performed quantitative RT-PCR. A.K.M. and C.J.F. analyzed data and wrote the manuscript.  
621 All authors read and approved the manuscript.

622

623 **Competing Financial Interests:** The authors declare no competing financial interests

624

625 **Table 1** Primer sequences used in this study.

626

| Plant                       | Genes          | Primer sequence<br>(5' → 3')                                 | Ampli-<br>-con<br>length<br>(pb) | Reference                              |
|-----------------------------|----------------|--------------------------------------------------------------|----------------------------------|----------------------------------------|
| <i>Arabidopsis thaliana</i> | <i>Actin7</i>  | F: AGTGGTCGTACAACCGGTATTGT<br>R: GATAGCATGAGGAAGAGCATAACC    | 91                               | (Martínez-Medina <i>et al.</i> , 2017) |
|                             | <i>GAPDH</i>   | F: CCATGGGCCCGAGGCTGGAG<br>R: ACCTTCTTGGCACCACCCTTCA         | 101                              | GenScript (GenScript, 2006)            |
|                             | <i>LOX2</i>    | F: AAGAGTTCTATGAGTCGCCAGA<br>R: TGTACTCTTCGTCAGGTGAATG       | 119                              | (Kuśnierczyk <i>et al.</i> , 2007)     |
|                             | <i>MYC2</i>    | F: CGGAGATCGAGTTCGCCGCC<br>R: AATCCCGCACCCGCAAGCGAA          | 191                              | GenScript (GenScript, 2006)            |
|                             | <i>CYP79B2</i> | F: ATCACATCCCTAAAGGAAGTCA<br>R: CCGGTACTGAACGAGATAAACC       | 165                              | (Kuśnierczyk <i>et al.</i> , 2007)     |
|                             | <i>CYP79B3</i> | F: GGTTTGGTCTGATCCACTTAGC<br>R: CTAGCATCATGGTCGTTATCGC       | 160                              | (Kuśnierczyk <i>et al.</i> , 2007)     |
| <i>Medicago truncatula</i>  | <i>EF1α</i>    | F: TGACAGGCGATCTGGTAAGG<br>R: CAGCGAAGGTCTCAACCAC            | 108                              | (Liu <i>et al.</i> , 2007)             |
|                             | <i>GAPDH</i>   | F: AACATCATTCCCAGCAGCAC<br>R: AACATCGACGGTAGGCACAC           | 108                              | (Liu <i>et al.</i> , 2007)             |
|                             | <i>PR5</i>     | F: TGCCTTAGCTTTGCATTCTT<br>R: AATTCCGCTGAGTTCGTTG            | 168                              | (Gao <i>et al.</i> , 2007)             |
|                             | <i>BGL</i>     | F: CAAATTGGGTCCAAAAATATGTGAC<br>R: GCACCATCATTGGGTGGATATGAAG | 229                              | (Gao <i>et al.</i> , 2007)             |

627

628

## 629 **Figure Legends**

630

631 **Fig. 1** The effect of seed exposure to plant volatiles on the herbivore fitness (a) Relative growth  
632 rate (RGR) of *S. exigua* caterpillars after 24 h herbivory on *A. thaliana* plants grown from  
633 control and volatile-exposed seeds ( $n= 6$ , each biological replicate had 1-3 technical replicates),  
634 (b) Relative growth rate of *S. exigua* caterpillars after 24 h herbivory on *A. thaliana* plants grown  
635 from control and indole-exposed seeds in a separate caterpillar herbivory experiment ( $n=8-10$ ,  
636 each biological replicate had 1-3 technical replicates), (c) Fecundity (nymph number per adult)  
637 and, (d) nymph weight after 14 days of herbivory on *M. truncatula* plant grown from control and  
638 volatile-exposed seed ( $n=6-8$ ). Values are shown as means  $\pm$  95% CI and significance was  
639 calculated by student's *t*-test (two-tailed).

640

641

642 **Fig. 2** Seeds exposure to plant volatiles does not affect *A. thaliana* plants growth and  
643 reproductive output. The effect of seed exposure to plant derived volatiles on (a) Leaf number,  
644 (b) Rosette diameter, (c) Bolt length, (d) Mean silique number and (e) Shoot weight of plants.  
645 DPS represents days after seed sowing. Values are shown as means  $\pm$  95% CI ( $n = 8-10$ ). Seed  
646 exposure to *e2HAL* reduced the seed germination on agar plates (e) Percent seed germination.  
647 Values are shown as means  $\pm$  SEM ( $n=90$ ). Significance was calculated by repeated measures  
648 ANOVA and one-way ANOVA.

649

650 **Fig. 3** Seeds exposure to *cis* configuration green leaf volatiles enhances growth of *Medicago*  
651 *truncatula*. (a) Picture of control and *z3HAC* seed exposed *M. truncatula* plants. The effect of  
652 seed exposure to plant derived volatiles on (b) leaf petiole length, (c) Leaf blade length, (d) Leaf  
653 blade width and, (e) axillary shoot length. For leaf petiole length, leaf blade length and width all  
654 the measurements were taken when the leaves were fully developed. Axillary shoot was  
655 measured at 64 days after seed sowing. Values for each metamer are shown as means + 95% CI  
656 ( $n=5-10$ ) and asterisks represent significant differences ( $p<0.05$ ) from controls based on one-way  
657 ANOVA followed by Dunnett's post-hoc analysis.

658

659 **Fig. 4.** Seed treatment with indole does not enhance herbivore-induced expression of defense  
660 marker genes. Relative transcript levels of the genes *LOX2*, *MYC2*, *CYB-B2* and *CYB-B3* in *A.*  
661 *thaliana* after 24 h of *S. exigua* herbivory was measured by quantitative RT-PCR analysis (a-d).  
662 Similarly, transcript levels of SA regulated marker genes *PR5* and *BGL* were measured in *M.*  
663 *trunacatula* after 14 days of pea aphid herbivory (e & f). Relative expression was determined ( $2^{-\Delta C_t}$ )  
664 using the geometric mean of two housekeeping genes for normalization. Bars represent mean  
665  $\pm$  SEM determined from three-five biological replicate assays, each biological replicate had two  
666 technical replicates. Different letters on the bar represent significant difference ( $p < 0.05$ ).  
667  
668

669 Fig. 1

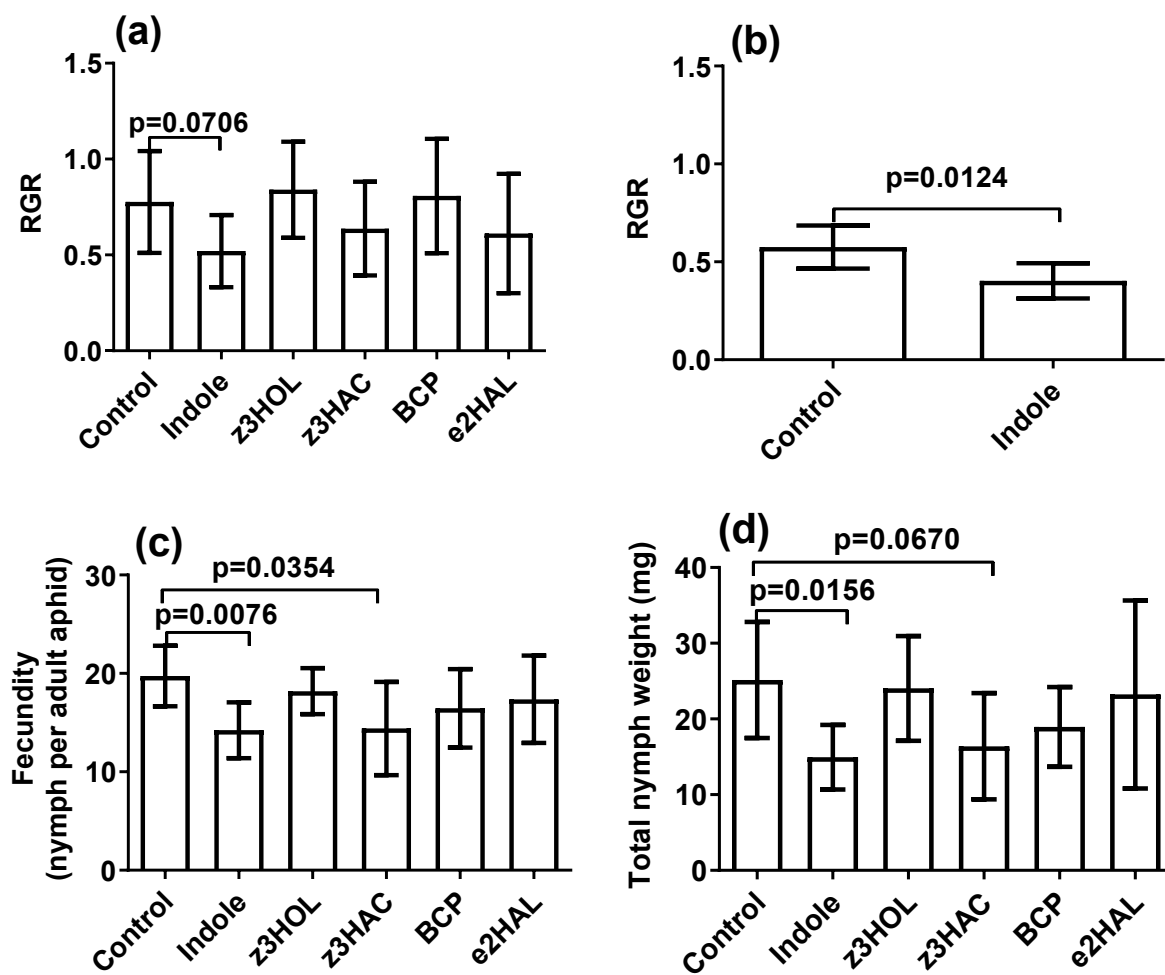

670

671



672

673 Fig. 2

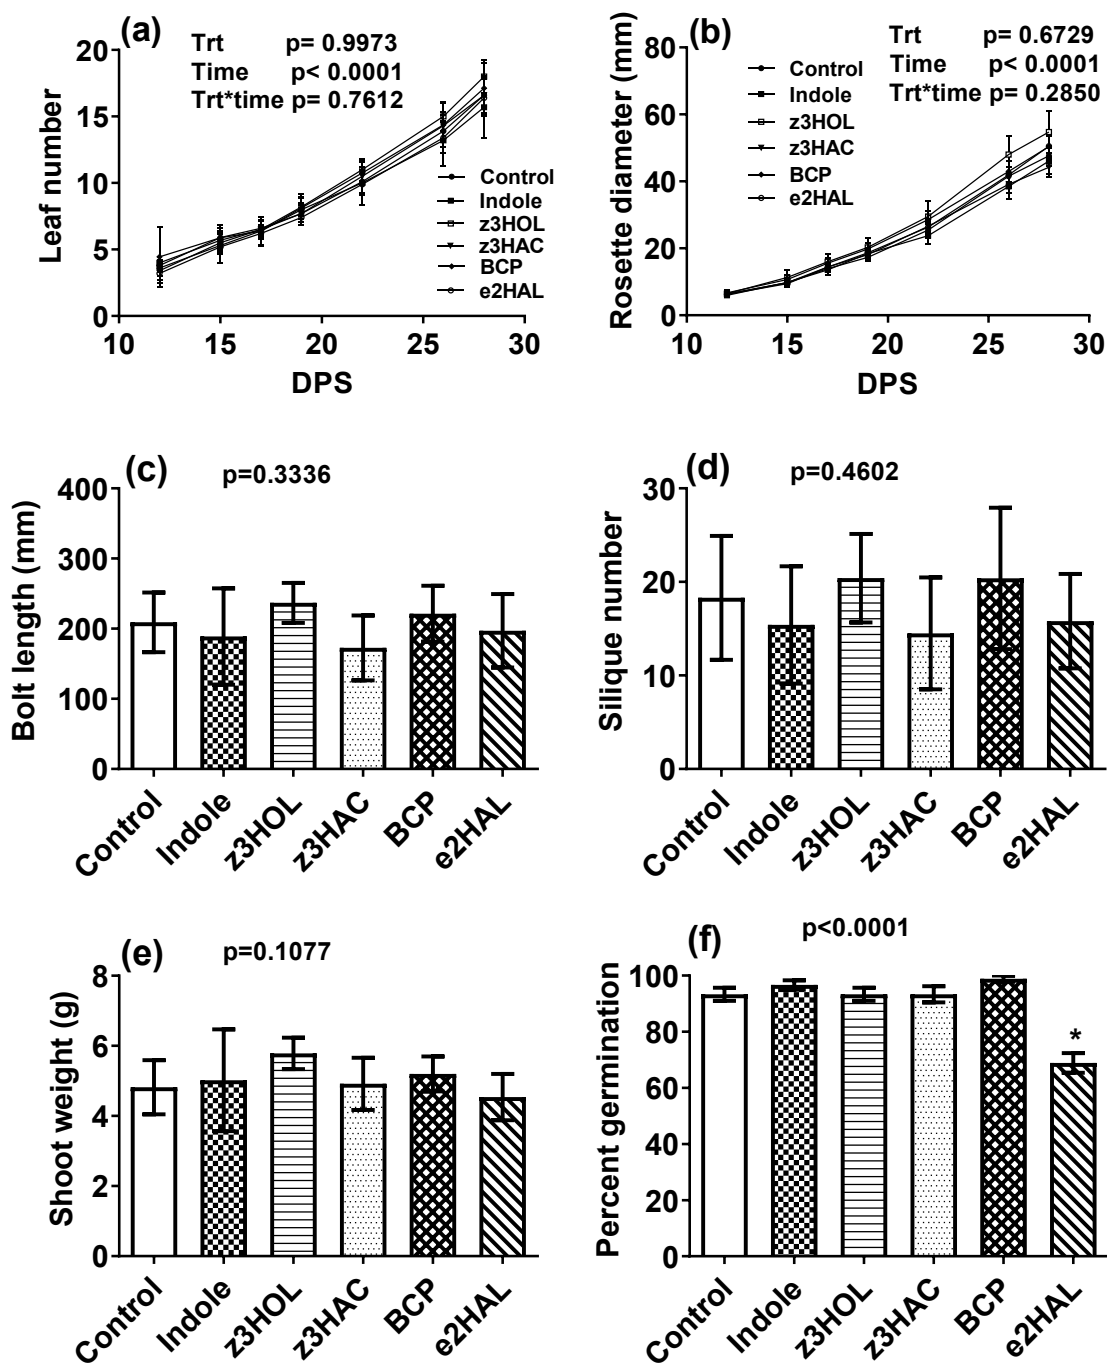

674

675

676 **Fig. 3**

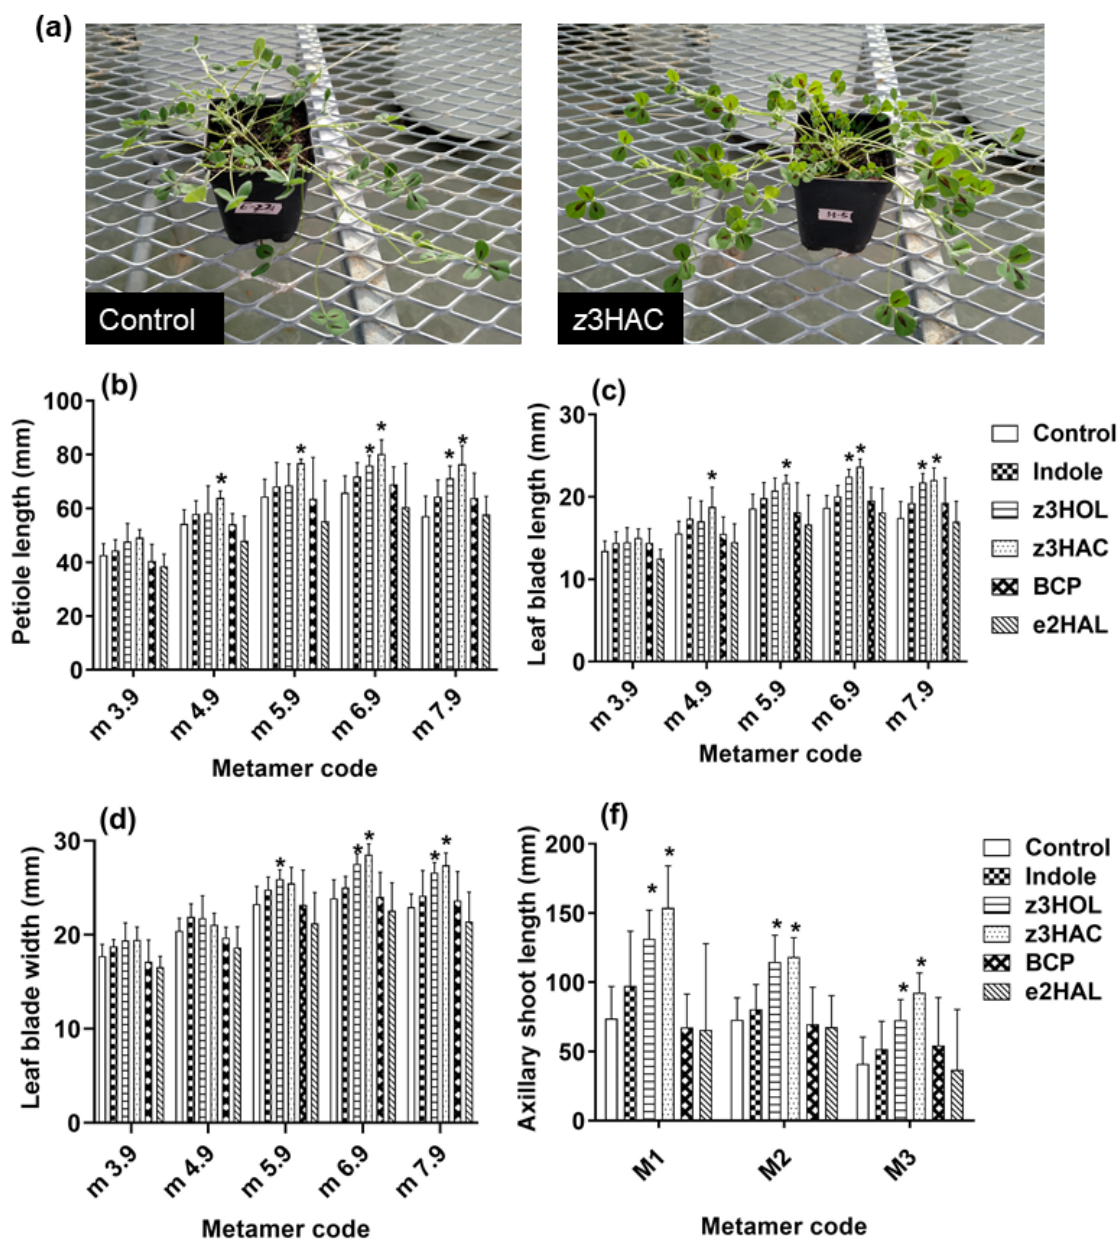

677

678

679 Fig. 4

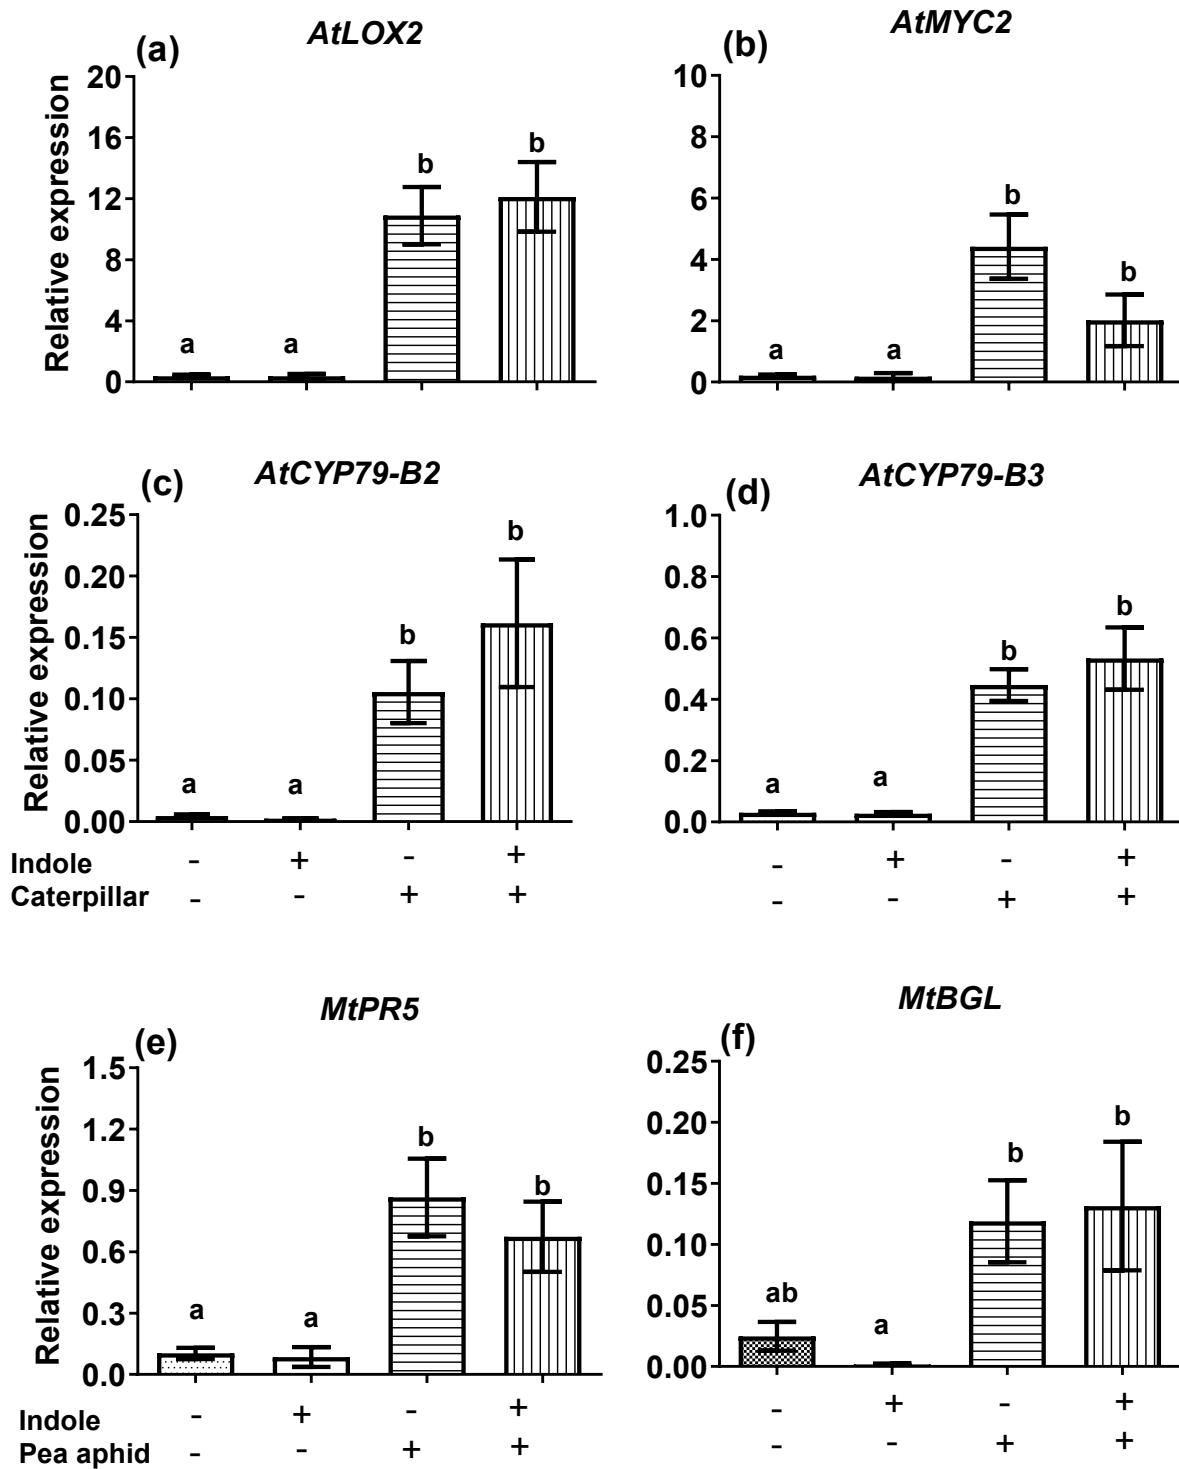

680  
681  
682

683 **Supplemental Information**

684 **Fig. S1** Pictorial representation of volatile dispensers used to expose seeds to synthetic plant

685 volatiles.

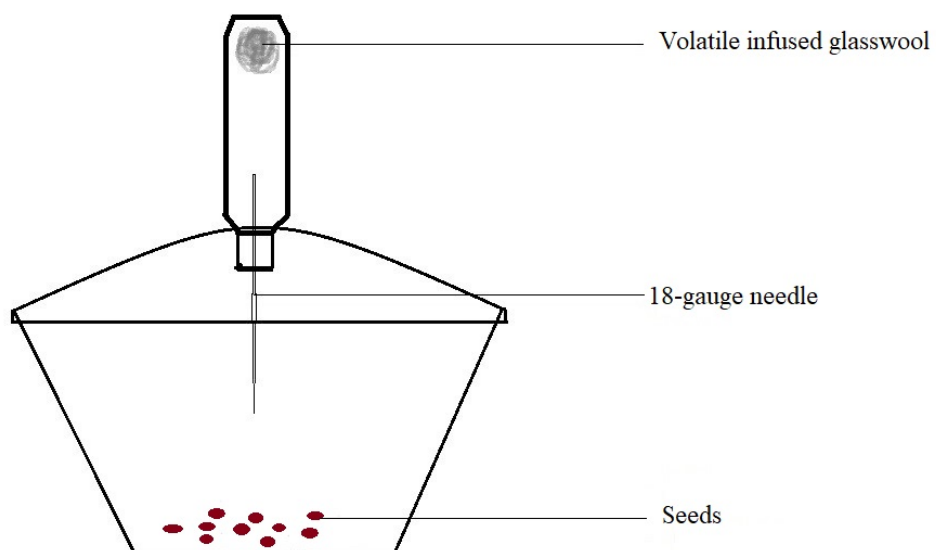

686

687

688

689 **Fig. S2** Seed exposure to plant derived volatiles have no effect on (a) Main shoot length and (b)

690 Total fruit number of *M. truncatula* plants. Values are shown as means  $\pm$  95% CI (n=5-10)

691 significance was calculated by one-way ANOVA followed by Dunnett's post-hoc test.

692

693

694

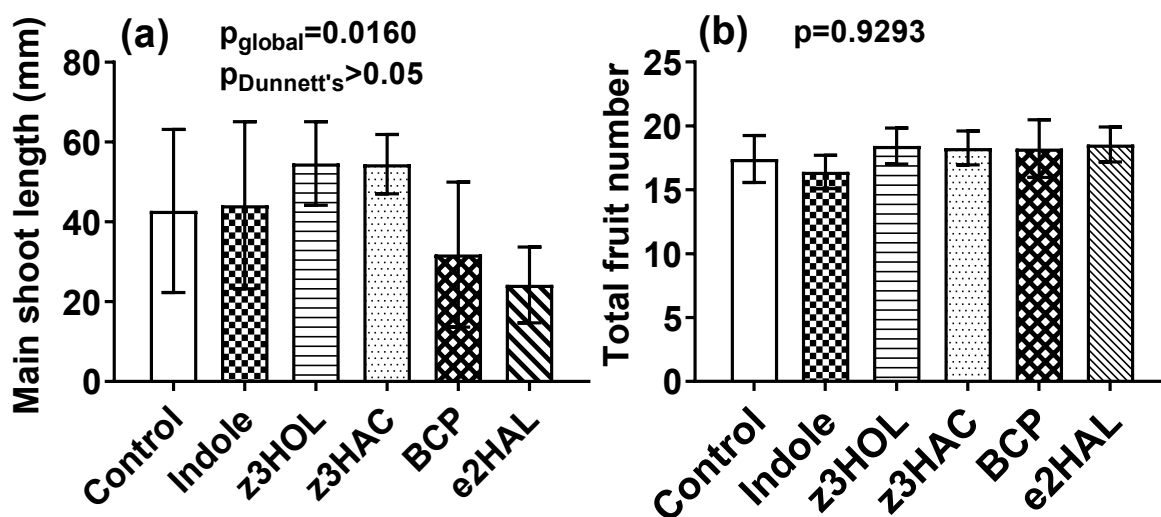

695

696

697

698

699

700

701

702

703

704

705

706

707 **Fig. S3** Pictorial representation of the numerical nomenclature coding system for vegetative  
708 growth of *M. truncatula*. Nomenclature coding started with unifoliate leaf as first metamers and  
709 subsequent trifoliate are labeled along the main shoot in ascending order. Axillary shoots are  
710 named as per the metamer of origin.

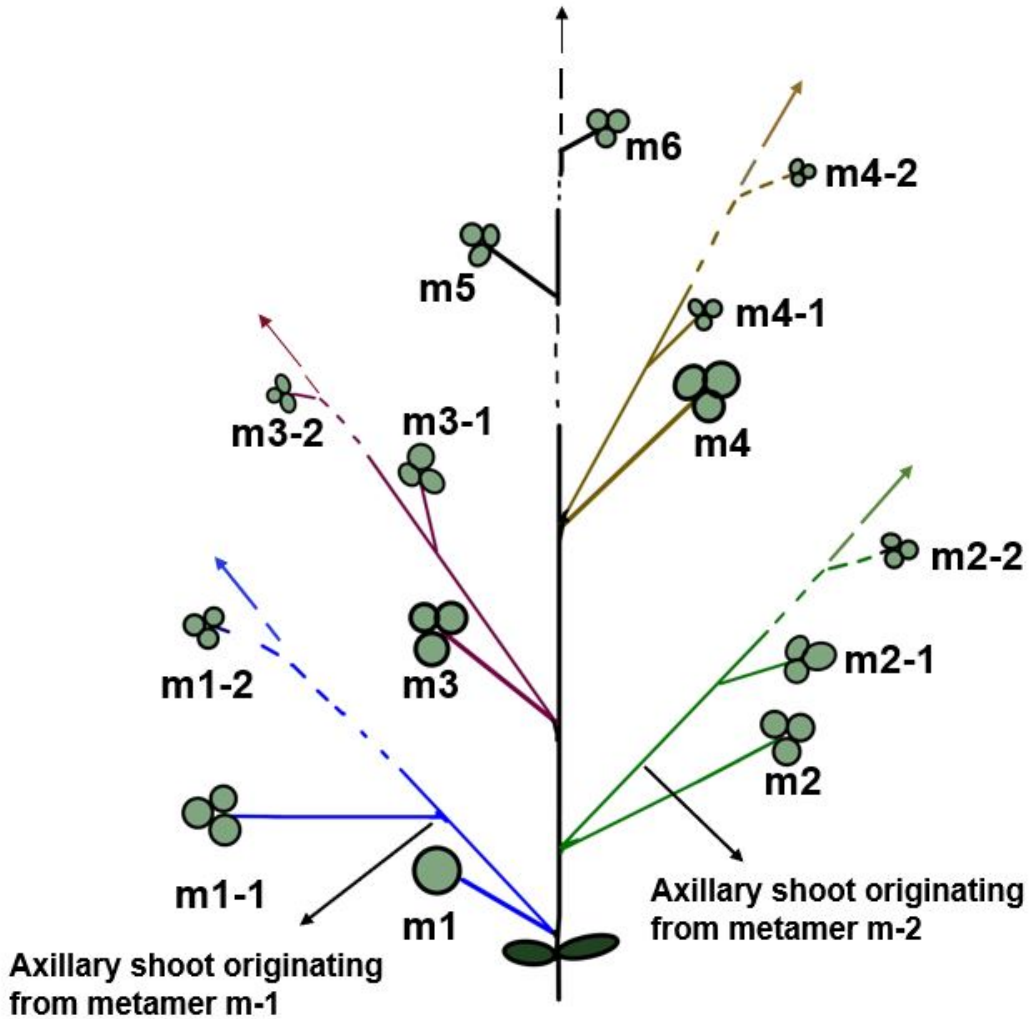

711
